# Supplementary material
Source: PubMed Central journal article supplement (PMC3513992)
Supplement: supp_140.1.56_DEV086413TableS1.pdf [file supp_140.1.56_DEV086413TableS1.pdf]

**Table S1. Quantification of *smo* requirement in self-renewal**

| Genotype                                      | Days after clone induction | Testes with marked CySC clones (%) | Testes with marked GSC clones (%) | Testes scored (n) |
|-----------------------------------------------|----------------------------|------------------------------------|-----------------------------------|-------------------|
| Control ( <i>FRT<sup>40A</sup></i> )          | 2                          | 81.4                               | 88.4                              | 43                |
|                                               | 7                          | 62.0                               | 82.3                              | 79                |
| <i>smo<sup>2</sup></i>                        | 2                          | 40.4                               | 86.5                              | 52                |
|                                               | 7                          | 8.9                                | 73.3                              | 101               |
| <i>smo<sup>119B6</sup></i>                    | 2                          | 53.3                               | 70.0                              | 30                |
|                                               | 7                          | 0.0                                | 72.7                              | 44                |
| <i>smo<sup>D16</sup></i>                      | 2                          | 41.2                               | 70.6                              | 34                |
|                                               | 7                          | 3.5                                | 59.6                              | 57                |
| <i>smo<sup>D16</sup>, Pka-CI<sup>H2</sup></i> | 2                          | 62.0                               | 84.0                              | 50                |
|                                               | 7                          | 17.0                               | 88.7                              | 53                |

Negatively marked clones of the indicated genotype were generated in adults after eclosion, aged for 2 or 7 days and scored for the presence of CySC and GSC clones. All samples were labeled for Vasa and Tj and the hub was identified as a cluster of low-level Tj-expressing cells. GSCs contact the hub directly, whereas Tj-positive cells one diameter away from the hub were scored as CySCs. Loss of CySCs in *smo* mutant clones at 7 dpci was statistically significant compared with the *FRT<sup>40A</sup>* control, as follows: *smo<sup>2</sup>*,  $P < 1.1 \times 10^{-8}$ ; *smo<sup>119b6</sup>*,  $P < 8.0 \times 10^{-8}$ ; *smo<sup>D16</sup>*,  $P < 3.5 \times 10^{-8}$ ; and compared with *smo<sup>D16</sup>* alone, *smo<sup>D16</sup>, Pka-CI<sup>H2</sup>* showed a significant rescue of CySC recovery ( $P < 0.04$ ). These data are represented graphically in Fig. 3G.
